# Supplementary material for: Triton Field Trials: Promoting Consistent Environmental Monitoring Methodologies for Marine Energy Sites
Source: MDPI journal article supplement (doi:10.3390/jmse10020177), 2022-01-28
Supplement: s1 [file s1]

Supplementary Material:

**Table S1.** A complete list of the 118 projects evaluated to determine the type and number of methodologies and technologies used to monitor for each stressor presented in Tables 3-8.

| <b>Project</b>                               | <b>Continent</b> | <b>Country of Origin</b> |
|----------------------------------------------|------------------|--------------------------|
| Ghana TC's Energy                            | Africa           | Ghana                    |
| BaiShakou Tidal Power Station                | Asia             | China                    |
| Haishan Tidal Power Plant                    | Asia             | China                    |
| Jiangxia Pilot Tidal Power Plant             | Asia             | China                    |
| Wanxiang-I Project                           | Asia             | China                    |
| Wanxiang-II Project                          | Asia             | China                    |
| IHI Ocean Current Turbine                    | Asia             | Japan                    |
| Sihwa Tidal Power Plant                      | Asia             | South Korea              |
| Uldolmok Tidal Power Station                 | Asia             | South Korea              |
| BioWave Port Fairy Pilot Wave Energy Project | Australia        | Australia                |
| Clarence Strait Tidal Energy Project         | Australia        | Australia                |
| Oceanlinx MK1                                | Australia        | Australia                |
| Oceanlinx MK2                                | Australia        | Australia                |
| Oceanlinx MK3                                | Australia        | Australia                |
| Perth Wave Energy Project                    | Australia        | Australia                |
| San Remo                                     | Australia        | Australia                |
| Wave Rider Wave Energy Pilot Plant           | Australia        | Australia                |
| Wave Swell Energy King Island Project        | Australia        | Australia                |
| Wave Energy Technology - New Zealand         | Australia        | New Zealand              |
| Crestwing Prototype Tordenskiold             | Europe           | Denmark                  |
| Folkecenter Wave Test Station                | Europe           | Denmark                  |
| Poseidon Floating Power                      | Europe           | Denmark                  |
| Vestmannasund DG100                          | Europe           | Denmark                  |
| Wave Star Hanstholm                          | Europe           | Denmark                  |
| Wavepiston V4                                | Europe           | Denmark                  |
| WESA Åland                                   | Europe           | Finland                  |

|                                                                                          |        |          |
|------------------------------------------------------------------------------------------|--------|----------|
| La Rance Tidal Barrage                                                                   | Europe | France   |
| Paimpol-Brehat Tidal Demonstration Project                                               | Europe | France   |
| Ria Etel P154                                                                            | Europe | France   |
| Sabella D10                                                                              | Europe | France   |
| Site d' Expérimentation en Mer pour la<br>Récupération de l'Energie des Vagues (SEM-REV) | Europe | France   |
| Atlantic Marine Energy Test Site                                                         | Europe | Ireland  |
| Galway Bay Test Site                                                                     | Europe | Ireland  |
| Ireland Floating Wind and Wave                                                           | Europe | Ireland  |
| Testing of Ocean Energy Buoy at Galway Bay,<br>Ireland                                   | Europe | Ireland  |
| Enermar Project                                                                          | Europe | Italy    |
| Fri-El Seapower - Messina Project                                                        | Europe | Italy    |
| Morild II Tidal Power Plant                                                              | Europe | Norway   |
| Seabased at the Maren Site                                                               | Europe | Norway   |
| Waves4Power Wave El Buoy                                                                 | Europe | Norway   |
| Companhia da Energia Oceanica SA (CEO) -<br>Agucadoura                                   | Europe | Portugal |
| Ocean Plug                                                                               | Europe | Portugal |
| Pico Oscillating Water Column                                                            | Europe | Portugal |
| SURGE Waveroller                                                                         | Europe | Portugal |
| Biscay Marine Energy Platform (BiMEP)                                                    | Europe | Spain    |
| Mutriku Wave Power Plant                                                                 | Europe | Spain    |
| OCEANTEC Wave Energy Converter 1:4 prototype                                             | Europe | Spain    |
| OCEANTEC Wave Energy Converter                                                           | Europe | Spain    |
| PLOCAN Marine Test Site for Ocean Energy<br>Converters                                   | Europe | Spain    |
| CorPower Ocean-Scapa Flow, EMEC                                                          | Europe | Sweden   |
| Lysekil Wave Energy Site                                                                 | Europe | Sweden   |

|                                                                    |        |                |
|--------------------------------------------------------------------|--------|----------------|
| Söderfors Project                                                  | Europe | Sweden         |
| Sotenäs Project                                                    | Europe | Sweden         |
| Anglesey Skerries Tidal Stream Array                               | Europe | United Kingdom |
| Argyll Tidal Demonstrator Project                                  | Europe | United Kingdom |
| Atlantis Resources Corporation at EMEC                             | Europe | United Kingdom |
| Brims Tidal Array                                                  | Europe | United Kingdom |
| Costa Head Wave Farm                                               | Europe | United Kingdom |
| Dyfed Floating Energy Park                                         | Europe | United Kingdom |
| Eco Wave Power wave energy power station<br>Gibraltar              | Europe | United Kingdom |
| EMEC Brillia Croo Grid-Connected Wave Test Site                    | Europe | United Kingdom |
| EMEC Fall of Warness Grid-Connected Tidal Test<br>Site             | Europe | United Kingdom |
| EMEC Scapa Flow Non Grid-Connected Wave Test<br>Site               | Europe | United Kingdom |
| EMEC Shapinsay Sound Non Grid-Connected<br>Nursery Tidal Test Site | Europe | United Kingdom |
| Fair Head Tidal Array                                              | Europe | United Kingdom |
| Falmouth Bay Test Site (FabTest)                                   | Europe | United Kingdom |
| Farr Point Wave Array - Phase 1                                    | Europe | United Kingdom |
| HS1000 at EMEC                                                     | Europe | United Kingdom |
| Katanes Floating Energy Park                                       | Europe | United Kingdom |
| Kyle Rhea Tidal Stream Array Project                               | Europe | United Kingdom |
| MeyGen Tidal Energy Project - Phase I                              | Europe | United Kingdom |
| Nautricity at EMEC                                                 | Europe | United Kingdom |
| North West Lewis Wave Array                                        | Europe | United Kingdom |
| Nova Innovation - Shetland Tidal Array                             | Europe | United Kingdom |
| Ocean Flow Energy - Sanda Sound                                    | Europe | United Kingdom |
| Ocean Power Technologies Moray Firth                               | Europe | United Kingdom |
| OpenHydro Alderney                                                 | Europe | United Kingdom |
| Oyster 1 at EMEC                                                   | Europe | United Kingdom |
| Oyster 800 at EMEC                                                 | Europe | United Kingdom |

|                                                          |               |                |
|----------------------------------------------------------|---------------|----------------|
| Pelamis Wave Power P2 Demonstration at EMEC              | Europe        | United Kingdom |
| Perpetuus Tidal Energy Center                            | Europe        | United Kingdom |
| PLAT-O at EMEC                                           | Europe        | United Kingdom |
| PowerKite Deep Green                                     | Europe        | United Kingdom |
| Ramsey Sound                                             | Europe        | United Kingdom |
| ScotRenewables SR2000 at EMEC                            | Europe        | United Kingdom |
| Sound of Islay Demonstration Tidal Array                 | Europe        | United Kingdom |
| Strangford Lough - MCT (SeaGen)                          | Europe        | United Kingdom |
| Swansea Tidal Lagoon                                     | Europe        | United Kingdom |
| Tocado InToTidal - EMEC                                  | Europe        | United Kingdom |
| Torr Head Project                                        | Europe        | United Kingdom |
| Voith HyTide at EMEC                                     | Europe        | United Kingdom |
| Wave Dragon Pre-Commercial Demonstration Project         | Europe        | United Kingdom |
| Wave Dragon Project - Milla Fjord Site                   | Europe        | United Kingdom |
| Wave Hub                                                 | Europe        | United Kingdom |
| West Islay Tidal Project                                 | Europe        | United Kingdom |
| Westray South Tidal Project                              | Europe        | United Kingdom |
| Yell Sound                                               | Europe        | United Kingdom |
| Minesto Holyhead Deep - Phase 1 (0.5MW)                  | Europe        | United Kingdom |
| Kvalsund Tidal Sail                                      | Europe        | Norway         |
| Kvalsund Tidal Turbine Prototype                         | Europe        | Norway         |
| Annapolis Tidal Station                                  | North America | Canada         |
| Fundy Ocean Research Center for Energy (FORCE) Test Site | North America | Canada         |
| Race Rocks Tidal Energy Project                          | North America | Canada         |
| Eco Wave Power Manzanillo 1 Project                      | North America | Mexico         |
| Admiralty Inlet Pilot Tidal Project                      | North America | United States  |
| Cobscook Bay Tidal Energy Project                        | North America | United States  |
| Igiugig Village RISEC project                            | North America | United States  |
| Kaneohe Bay OPT Wave Project                             | North America | United States  |

|                                                                                                    |               |               |
|----------------------------------------------------------------------------------------------------|---------------|---------------|
| Lock and Dam No. 2 Hydroelectric Project                                                           | North America | United States |
| Mississippi River Projects                                                                         | North America | United States |
| PacWave Test Site                                                                                  | North America | United States |
| PG&E WaveConnect                                                                                   | North America | United States |
| Reedsport OPT Wave Park Settlement Agreement                                                       | North America | United States |
| Roosevelt Island Tidal Energy (RITE) Demonstration-Pilot                                           | North America | United States |
| Wave Energy Technology - New Zealand Multi-Mode Wave Energy Converter Advancement Project (Oregon) | North America | United States |
| Western Passage Tidal Energy Project                                                               | North America | United States |
| Whitestone Poncelet RISEC                                                                          | North America | United States |
| Marine Energy Research and Innovation Centre (MERIC)                                               | South America | Chile         |
